# Supplementary material
Source: HighWire-hosted journal article supplement (doi:10.1101/rna.037606.112)
Supplement: SuppLegends.docx [file SuppLegends.docx]

*Supplementary Information.*

Equations used to fit the sensorgrams.

Table S1: Equilibrium and rate constants for SL2kistem-5BSL3.2 complexes.

Figure S1: Native acrylamide gels of stem-loop Seq9110 and 5BSL3.2.

Figure S2: Kinetic analysis by the SCK method of Seq9110 binding to biotinylated 5BSL3.2.

Figure S3: Kinetic analysis of Seq9110aaa binding to biotinylated 5BSL3.2.

Figure S4: Kinetic analysis of SL2aca binding to Seq9110 while it dissociates from biotinylated 5BSL3.2.

Figure S5: Kinetic analysis of the SL2WT-Seq9110-5BSL3.2 ternary complex.

Figure S6: Kinetic analysis of complexes formed between 5BSL3.2 or SL2WT immobilized on the sensor chip surface and SL2 hairpins or mini5BSL3.2, a truncated version of 5BSL3.2.

Figure S7: Kinetic analysis of the 5BSL3.2-AS9110 complex.
